# Supplementary material for: Tau-tubulin kinase 1 and amyloid-β peptide induce phosphorylation of collapsin response mediator protein-2 and enhance neurite degeneration in Alzheimer disease mouse models
Source: PubMed Central journal article supplement (PMC7001309; doi:10.1186/s40478-020-0890-4), 2020-02-04
Supplement: 40478_2020_890_MOESM1_ESM.pdf [file 40478_2020_890_MOESM1_ESM.pdf]

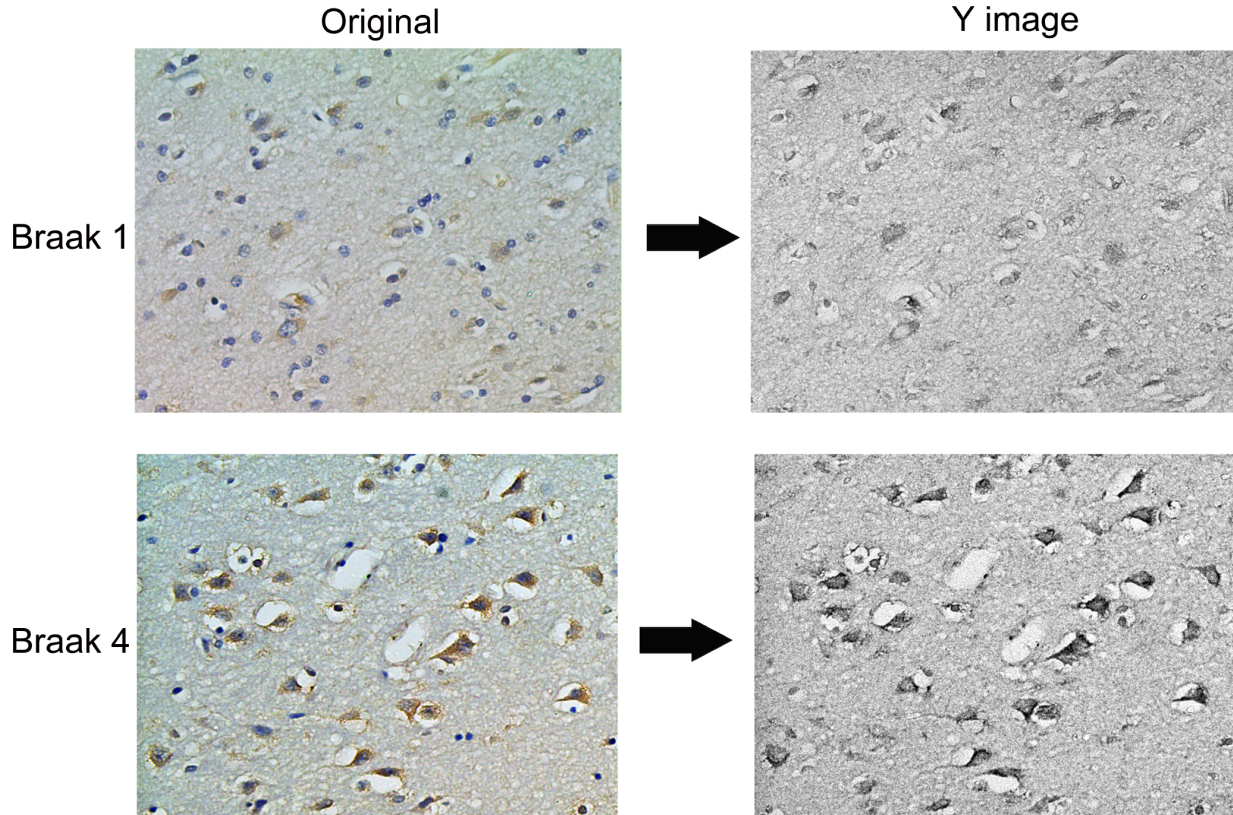

**Supplementary Figure 1.** Representative conversion of CMYK format and extraction of Y channel (right) for DAB intensity measurement.

### A. Entorhinal cortex (Layer II/III)

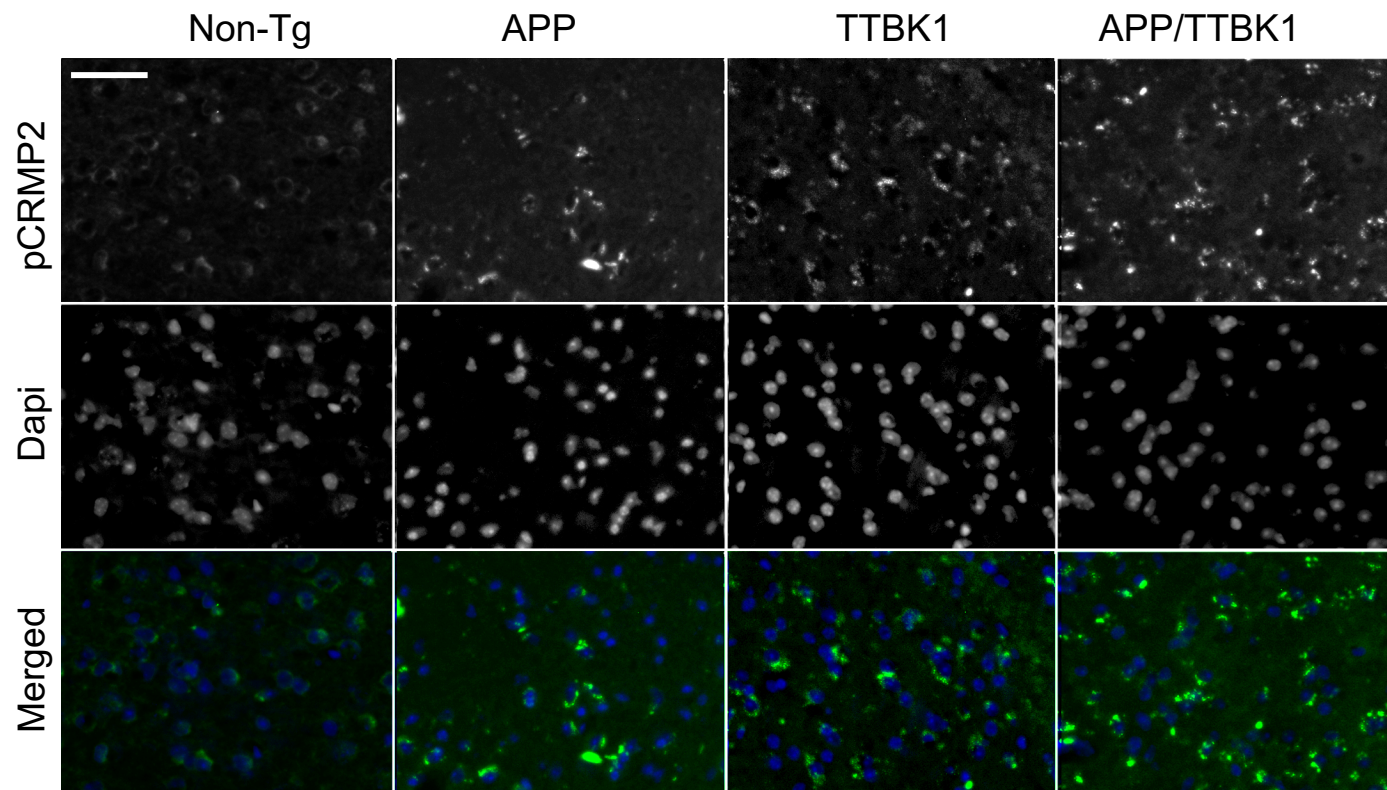

### B. Dentate gyrus

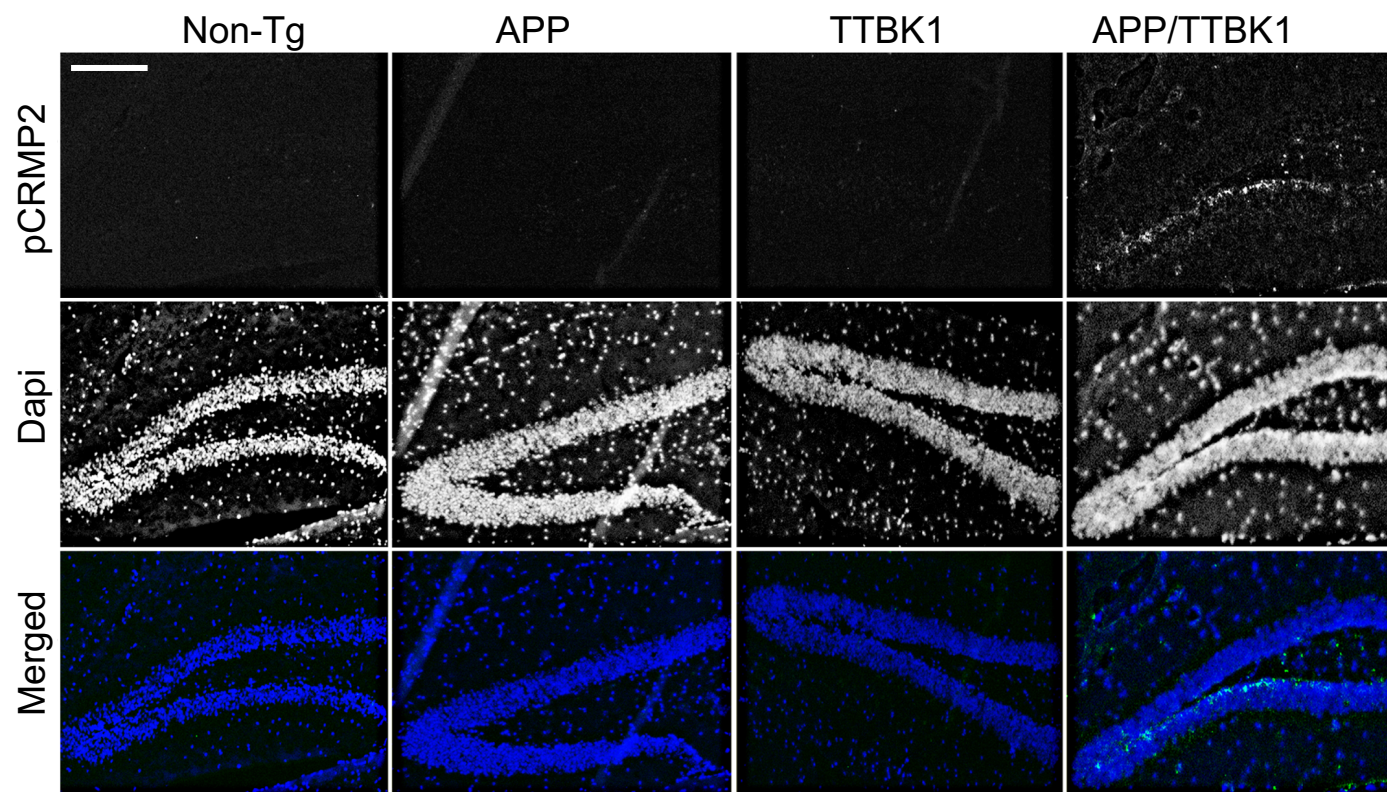

**Supplementary Figure 2.** Split channel images of pCRMP2 (green in bottom panels of A and B) and Dapi (blue in bottom panels of A and B) as shown in Fig. 2A and C. Scale bars = 50 (A) and 200  $\mu$ m (C)
